# Supplementary material
Source: Research Square preprint supplement (doi:10.21203/rs.3.rs-8925974/v1)
Supplement: Supplementary file 1 [file 79951eb53c24e7fe2f652263.docx]

| **Supplemental File 1.** The used search strategies in information sources | |
| --- | --- |
| **Database** | **Search Strategy** |
| PubMed | ("Shear wave elastography"[Title/Abstract] OR "SWE"[Title/Abstract] OR "Shear wave velocity"[Title/Abstract] OR "Sonoelastography"[Title/Abstract] OR "Acoustic radiation force impulse"[Title/Abstract] OR "ARFI"[Title/Abstract]) AND ("Masseter"[Title/Abstract] OR "Masticatory muscle"[Title/Abstract]) AND ("Bruxism"[Title/Abstract] OR "Temporomandibular disorders"[Title/Abstract] OR "TMD"[Title/Abstract] OR "Myofascial pain"[Title/Abstract] OR "Clenching"[Title/Abstract] OR "Stiffness"[Title/Abstract]) |
| Web of Science | TS=(("Shear wave elastography" OR "SWE" OR "Shear wave velocity" OR "Sonoelastography" OR "Acoustic radiation force impulse" OR "ARFI") AND ("Masseter" OR "Masticatory muscle") AND ("Bruxism" OR "Temporomandibular disorders" OR "TMD" OR "Myofascial pain" OR "Clenching" OR "Stiffness")) |
| Scopus | TITLE-ABS-KEY ( ("Shear wave elastography" OR "SWE" OR "Shear wave velocity" OR "Sonoelastography" OR "Acoustic radiation force impulse" OR "ARFI") AND ("Masseter" OR "Masticatory muscle") AND ("Bruxism" OR "Temporomandibular disorders" OR "TMD" OR "Myofascial pain" OR "Clenching" OR "Stiffness") ) |
| Open Grey | Bruxism AND Ultrasound |
