# Supplementary material
Source: Research Square preprint supplement (doi:10.21203/rs.3.rs-8925974/v1)
Supplement: Supplementary file 2 [file ec7a011c7151823647e80d7d.docx]

| **Supplemental File 2.** List of Excluded Studies and Reasons for Exclusion | | | |
| --- | --- | --- | --- |
| **No** | **Author (Year)** | **Study Title** | **Exclusion Reason*** |
| 1 | Ariji et al. (2013)1 | Sonographic elastography for evaluation of masseter muscle hardness | 1 (Strain Elastography) |
| 2 | Ariji et al. (2016) 2 | Shear-wave sonoelastography for assessing masseter muscle hardness in comparison with strain sonoelastography: study with phantoms and healthy volunteers | 2 (No Control Group / Healthy Participants Only) |
| 3 | Arda et al. (2011)3 | Quantitative assessment of normal soft-tissue elasticity using shear-wave ultrasound elastography | 2 (No Control Group / Healthy Participants Only) |
| 4 | Herman et al. (2017)4 | Shear wave elastography parameters of normal soft tissues of the neck | 2 (No Control Group / Healthy Participants Only) |
| 5 | Minami & Ogura (2022)5 | Quantitative analysis of masseter muscle hardness with shear-wave elastography: Preliminary study on comparison between during rest and contraction in young adults | 2 (No Control Group / Healthy Participants Only) |
| 6 | Badea et al. (2014) 6 | Quantitative assessment of the masseter muscle's elasticity using Acoustic Radiation Force Impulse | 5 (Wrong Population: Radiotherapy Patients) |
| 7 | Olchowy et al. (2020)7 | Potential of Using Shear Wave Elastography in the Clinical Evaluation and Monitoring of Changes in Masseter Muscle Stiffness | 2 (No Control Group) |
| 8 | Olchowy et al. (2022)8 | Assessment of the masseter stiffness in patients during conservative therapy for masticatory muscle disorders with shear wave elastography | 2 (No Control Group) |
| 9 | Saglam et al. (2024) 9 | Evaluation of the effects of occlusal splint and masseter muscle injection in patients with myofascial pain: a randomised controlled trial | 2 (No Control Group) |
| 10 | Yalcin & Ozturk (2022) 10 | Ultrasonographic evaluation of the effect of splint therapy on masseter muscle and blood flow in patients with bruxism | 2 (No Control Group) |
| 11 | Mierzwa et al. (2022) 11 | Botox Therapy for Hypertrophy of the Masseter Muscle Causes a Compensatory Increase of Stiffness of Other Muscles of Masticatory Apparatus | 2 (No Control Group) |
| 12 | Acikgoz et al. (2025) 12 | Immediate and short-term effect of manual therapy on masseter muscle: an ultrasonography study | 2 (No Control Group) |
| 13 | Costa et al. (2018) 13 | Muscle hardness and masticatory myofascial pain: Assessment and clinical relevance | 4 (Wrong Study Design: Review) |
| 14 | Miller et al. (2024) 14 | Using ultrasound elastography to assess non-invasive, non-pharmacological interventions for musculoskeletal stiffness: a systematic review and meta-analysis | 4 (Wrong Study Design: Systematic Review) |
| 15 | Klatkiewicz et al. (2018) 15 | Ultrasonography in the Diagnosis of Temporomandibular Disorders: A Meta-Analysis | 4 (Wrong Study Design: Meta-Analysis) |
| 16 | Bisht et al. (2024) 16 | Ultrasound elastography in temporomandibular disorders: A narrative review | 4 (Wrong Study Design: Narrative Review) |
| 17 | Stiver et al. (2023) 17 | Measuring Shear Wave Velocity in Adult Skeletal Muscle with Ultrasound 2-D Shear Wave Elastography: A Scoping Review | 4 (Wrong Study Design: Scoping Review) |
| 18 | Joy et al. (2015) 18 | Quantitative assessment of Thiel soft-embalmed human cadavers using shear wave elastography | 5 (Wrong Population: Cadaver Study) |
| 19 | Sanabria et al. (2020) 19 | Ultrasound Imaging of Injections in Masseter Muscle without Contrast Agent Using Strain Elastography and a Novel B-Mode Spatiotemporal Filter | 5 (Wrong Population: Animal Study) |
| 20 | Uçar et al. (2022) 20 | Masseter Muscle Thickness And Elasticity in Bruxism After Exercise Treatment: A Comparison Trial | 1 (Strain Elastography / Qualitative Data) |
| Exclusion Reason Codes:  1 = Strain Elastography  2 = No Healthy Control Group / Healthy-only sample  3 = Insufficient Quantitative Data  4 = Wrong Study Design (Review, Systematic Review, Meta-analysis, Narrative Review, Scoping Review)  5 = Wrong Population (Radiotherapy patients, cadaver study, animal study) | | | |

References

1. Ariji Y, Gotoh A, Hiraiwa Y, et al. Sonographic elastography for evaluation of masseter muscle hardness. Article. *Oral Radiology*. 2013;29(1):64-69. doi:10.1007/s11282-012-0111-3

2. Ariji Y, Nakayama M, Nishiyama W, Nozawa M, Ariji E. Shear-wave sonoelastography for assessing masseter muscle hardness in comparison with strain sonoelastography: study with phantoms and healthy volunteers. *Dentomaxillofac Radiol*. 2016;45(2):20150251. doi:10.1259/dmfr.20150251

3. Arda K, Ciledag N, Aktas E, Aribas BK, Kose K. Quantitative assessment of normal soft-tissue elasticity using shear-wave ultrasound elastography. *AJR Am J Roentgenol*. Sep 2011;197(3):532-6. doi:10.2214/AJR.10.5449

4. Herman J, Sedlackova Z, Vachutka J, Furst T, Salzman R, Vomacka J. Shear wave elastography parameters of normal soft tissues of the neck. *Biomed Pap Med Fac Univ Palacky Olomouc Czech Repub*. Sep 2017;161(3):320-325. doi:10.5507/bp.2017.024

5. Minami Y, Ogura I. Quantitative analysis of masseter muscle hardness with shear-wave elastography: Preliminary study on comparison between during rest and contraction in young adults. *Journal of Oral and Maxillofacial Radiology*. 2022;10(1)

6. Badea I, Tamas-Szora A, Chiorean I, Fildan F, Ciulea E, Badea M. Quantitative assessment of the masseter muscle's elasticity using Acoustic Radiation Force Impulse. *Med Ultrason*. Jun 2014;16(2):89-94. doi:10.11152/mu.201.3.2066.162.ib1asz2

7. Olchowy C, Wieckiewicz M, Sconfienza LM, et al. Potential of Using Shear Wave Elastography in the Clinical Evaluation and Monitoring of Changes in Masseter Muscle Stiffness. *PAIN RESEARCH & MANAGEMENT*. NOV 12 2020;20204184268. doi:10.1155/2020/4184268

8. Olchowy A, Seweryn P, Olchowy C, Wiȩckiewicz M. Assessment of the masseter stiffness in patients during conservative therapy for masticatory muscle disorders with shear wave elastography. Article. *BMC Musculoskelet Disord*. 2022;23(1)439. doi:10.1186/s12891-022-05392-9

9. Saglam R, Delilbasi C, Sayin Ozel G, Subasi ID. Evaluation of the effects of occlusal splint and masseter muscle injection in patients with myofascial pain: a randomised controlled trial. *J Oral Facial Pain Headache*. Sep 2024;38(3):64-76. doi:10.22514/jofph.2024.028

10. Yalcin ED, Öztürk EM. Ultrasonographic evaluation of the effect of splint therapy on masseter muscle and blood flow in patients with bruxism. Article. *Cranio - Journal of Craniomandibular Practice*. 2025;43(1):135-143. doi:10.1080/08869634.2022.2088575

11. Mierzwa D, Olchowy C, Olchowy A, et al. Botox Therapy for Hypertrophy of the Masseter Muscle Causes a Compensatory Increase of Stiffness of Other Muscles of Masticatory Apparatus. *Life*. 2022;12(6):840.

12. Acıkgoz G, Uzun E, Yıldız G, Akgul HM, Aslan Telci E. Immediate and short-term effect of manual therapy on masseter muscle: an ultrasonography study. *Oral Radiol*. Oct 2025;41(4):517-524. doi:10.1007/s11282-025-00827-0

13. Costa YM, Ariji Y, Ferreira D, et al. Muscle hardness and masticatory myofascial pain: Assessment and clinical relevance. *J Oral Rehabil*. AUG 2018;45(8):640-646. doi:10.1111/joor.12644

14. Miller T, Bello UM, Tsang CSL, Winser SJ, Ying MTC, Pang MYC. Using ultrasound elastography to assess non-invasive, non-pharmacological interventions for musculoskeletal stiffness: a systematic review and meta-analysis. *Disabil Rehabil*. Aug 2024;46(16):3549-3563. doi:10.1080/09638288.2023.2252744

15. Klatkiewicz T, Gawriołek K, Pobudek Radzikowska M, Czajka-Jakubowska A. Ultrasonography in the Diagnosis of Temporomandibular Disorders: A Meta-Analysis. *Med Sci Monit*. Feb 8 2018;24:812-817. doi:10.12659/msm.908810

16. Patil DJ, Rathore RK, Patel A. Ultrasound Elastography in Temporomandibular Disorders: A Narrative Review. *Cureus*. Sep 2024;16(9):e70004. doi:10.7759/cureus.70004

17. Stiver ML, Mirjalili SA, Agur AMR. Measuring Shear Wave Velocity in Adult Skeletal Muscle with Ultrasound 2-D Shear Wave Elastography: A Scoping Review. *Ultrasound Med Biol*. Jun 2023;49(6):1353-1362. doi:10.1016/j.ultrasmedbio.2023.02.005

18. Joy J, McLeod G, Lee N, et al. Quantitative assessment of Thiel soft-embalmed human cadavers using shear wave elastography. *Ann Anat*. Nov 2015;202:52-6. doi:10.1016/j.aanat.2015.06.007

19. Sanabria SJ, Ruby L, Kuonen J, et al. Ultrasound Imaging of Injections in Masseter Muscle without Contrast Agent Using Strain Elastography and a Novel B-Mode Spatiotemporal Filter. *Ultrasound Med Biol*. Oct 2020;46(10):2717-2735. doi:10.1016/j.ultrasmedbio.2020.06.022

20. Uçar İ, Kararti C, Dadali Y, Özüdoğru A, Okçu M. Masseter Muscle Thickness And Elasticity in Bruxism After Exercise Treatment: A Comparison Trial. *J Manipulative Physiol Ther*. May 2022;45(4):282-289. doi:10.1016/j.jmpt.2022.07.004
